# Supplementary material for: Reef-building corals farm and feed on their photosynthetic symbionts
Source: PubMed Central journal article supplement (PMC10468396; doi:10.1038/s41586-023-06442-5), 2023-08-23
Supplement: 41586_2023_6442_MOESM1_ESM.pdf [file 41586_2023_6442_MOESM1_ESM.pdf]

**Supplementary information**

---

**Reef-building corals farm and feed on their photosynthetic symbionts**

---

In the format provided by the authors and unedited

## **Reef-building corals farm and feed on their photosynthetic symbionts**

Jörg Wiedenmann, Cecilia D'Angelo, M. Loreto Mardones, Shona Moore, Cassandra E. Benkwitt, Nicholas A.J. Graham, Bastian Hambach, Paul A. Wilson, James Vanstone; Gal Eyal, Or Ben-Zvi, Yossi Loya, Amatzia Genin

### **Supplementary Information**

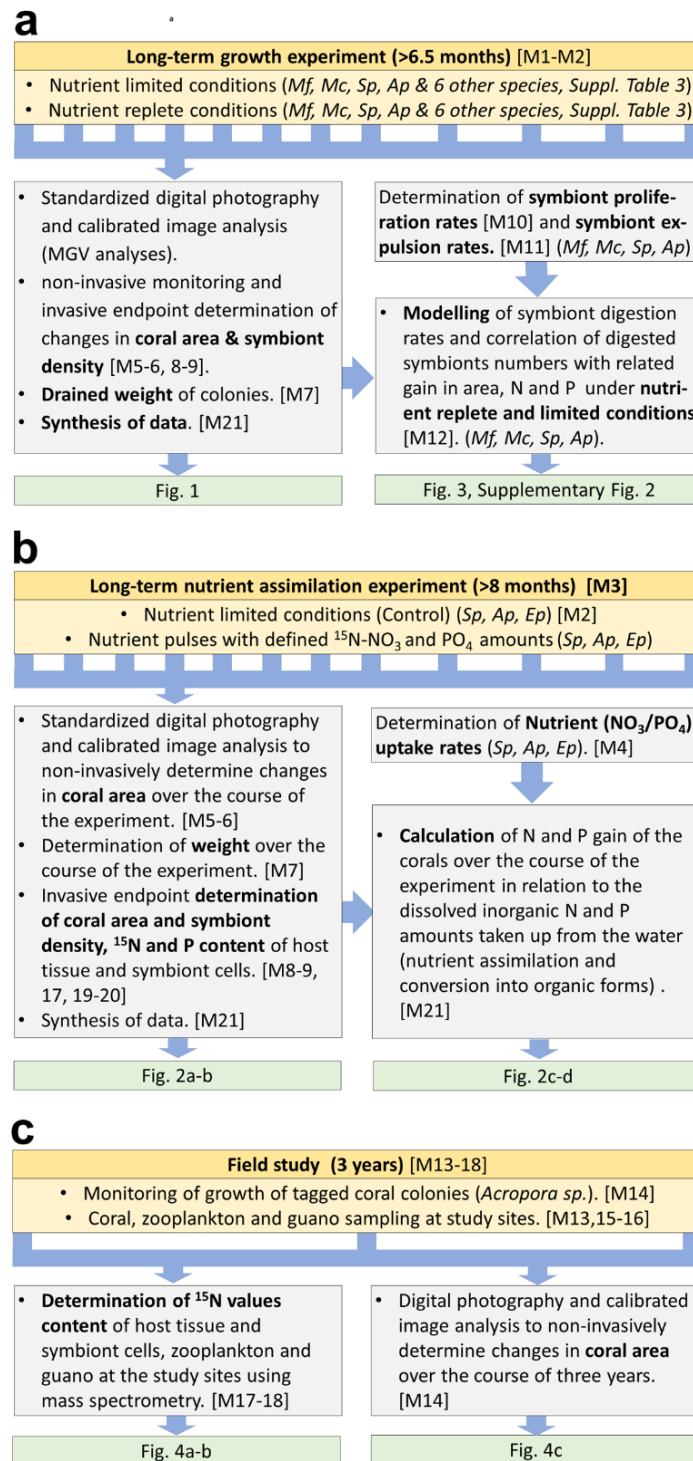

**Supplementary Figure 1: Overview of experiments and associated methods.** (a) Long-term experiment to determine the growth of corals under replete and limited concentrations of dissolved inorganic N and P in the absence of particulate organic food. (b) Long-term experiment to quantify the uptake and partitioning of <sup>15</sup>N-nitrate and phosphate and incorporation as organic N and P in host and symbiont cells in the absence of particulate organic food. (d) Field study to analyse growth and <sup>15</sup>N isotopic values and potential nitrogen sources (guano, zooplankton) in corals close to islands with dense seabird colonies and with low seabird numbers. *Mf*, *Montipora foliosa*; *Mc*, *Montipora capricornis*; *Sp*, *Stylophora pistillata*; *Ap*, *Acropora polystoma*; *Ep*, *Euphyllia paradivisa*. Method [M] Numbers in brackets refer to relevant paragraphs in the method section.

**Supplementary Table 1: Experimental corals and their symbionts**

| Experimental coral species    | Symbiont species associated with experimental coral (ITS2 sequence) <sup>(a)</sup> | Growth morphology             | Global distribution of coral species <sup>(c)</sup>                                                                                                                                                             |
|-------------------------------|------------------------------------------------------------------------------------|-------------------------------|-----------------------------------------------------------------------------------------------------------------------------------------------------------------------------------------------------------------|
| <i>Acropora polystoma</i>     | <i>Cladocopium sp.</i> (C3cc)<br>(Clade C)                                         | Branching                     | <ul style="list-style-type: none"> <li>• 46.7% of global ecoregions</li> <li>• 52.6% of ecoregions in the IndoPacific realm</li> <li>• Red Sea</li> </ul>                                                       |
| <i>Montipora capricornis</i>  | <i>Cladocopium sp.</i> (C26a)<br>(Clade C)                                         | Foliose                       | <ul style="list-style-type: none"> <li>• 26% of global ecoregions</li> <li>• 29.3% of ecoregions in the IndoPacific realm</li> </ul>                                                                            |
| <i>Montipora foliosa</i>      | <i>Cladocopium sp.</i> (C15)<br>(Clade C)                                          | Foliose                       | <ul style="list-style-type: none"> <li>• 58% of global ecoregions</li> <li>• 65.4% of ecoregions in the IndoPacific realm</li> <li>• Red Sea</li> </ul>                                                         |
| <i>Porites lichen</i>         | <i>Cladocopium sp.</i> (C96)<br>(Clade C)                                          | Encrusting                    | <ul style="list-style-type: none"> <li>• 68.7% of global ecoregions</li> <li>• 77.4% of ecoregions in the IndoPacific realm</li> <li>• Red Sea &amp; Persian/Arabian Gulf</li> <li>• Eastern Pacific</li> </ul> |
| <i>Seriatopora hystrix</i>    | <i>Durusdinium trenchii / glynnii</i><br>(Clade D)                                 | Branching                     | <ul style="list-style-type: none"> <li>• 58% of global ecoregions</li> <li>• 65.4% of ecoregions in the IndoPacific realm</li> <li>• Red Sea</li> </ul>                                                         |
| <i>Stylophora pistillata</i>  | <i>Symbiodinium microadriaticum</i><br>(Clade A)                                   | Branching                     | <ul style="list-style-type: none"> <li>• 68.7% of global ecoregions</li> <li>• 77.4% of ecoregions in the IndoPacific realm</li> <li>• Red Sea &amp; Persian/Arabian Gulf</li> </ul>                            |
| <i>Turbinaria reniformis</i>  | <i>Cladocopium sp.</i> (C21)<br><i>Cladocopium sp.</i> (C3)<br>(Clade C)           | Foliose                       | <ul style="list-style-type: none"> <li>• 67.3% of global ecoregions</li> <li>• 75.9% of ecoregions in the IndoPacific realm</li> <li>• Red Sea &amp; Persian/Arabian Gulf</li> </ul>                            |
| <i>Euphyllia paradivisa</i>   | <i>Cladocopium sp.</i> (C1)<br>(Clade C) <sup>(b)</sup>                            | Phaceloid                     | <ul style="list-style-type: none"> <li>• Central Indopacific <sup>(d)</sup></li> <li>• Red Sea <sup>(e)</sup></li> </ul>                                                                                        |
| <i>Pavona cactus</i>          | <i>n.d.</i>                                                                        | Contorted fronds              | <ul style="list-style-type: none"> <li>• 60% of global ecoregions</li> <li>• 67.7% of ecoregions in the IndoPacific realm</li> </ul>                                                                            |
| <i>Hydnophora grandis</i>     | <i>n.d.</i>                                                                        | Encrusting or subarborescent. | <ul style="list-style-type: none"> <li>• Central Indopacific<sup>(d)</sup></li> </ul>                                                                                                                           |
| <i>Pocillopora damicornis</i> | <i>n.d.</i>                                                                        | Branching                     | <ul style="list-style-type: none"> <li>• 85.3% of global ecoregions</li> <li>• 96.2% of ecoregions in the IndoPacific realm</li> <li>• Red Sea &amp; Persian/Arabian Gulf</li> <li>• Eastern Pacific</li> </ul> |
| <i>Lobophytum crassum</i>     | <i>n.d.</i>                                                                        | Leather (soft) coral          | <ul style="list-style-type: none"> <li>• Australia, India, Japan, Madagascar, Red Sea, Seychelles, South Africa, Tanzania<sup>(d)</sup></li> </ul>                                                              |

(a) From <sup>66</sup>

(b) From <sup>44</sup>

(c) From “Corals of the World – online” (<http://www.coralsoftheworld.org/page/home/>) unless indicated otherwise

(d) “World Register of Marine Species – online” (<https://www.marinespecies.org/index.php>)

(e) From <sup>67</sup>
